# Supplementary material for: Zn2+and Cu2+induced nanosheets and nanotubes in six different lectins by TEM
Source: Royal Society of Chemistry journal article supplement (doi:10.1039/c5ra00481k), 2015-01-01
Supplement: c5ra00481k1.pdf [file c5ra00481k1.pdf]

# Zn<sup>2+</sup> and Cu<sup>2+</sup> induced nanosheets and nanotubes in six different lectins by TEM

*Khatija Tabbasum and Chebrolu Pulla Rao\**

Bioinorganic Laboratory, Department of Chemistry, Indian Institute of Technology Bombay,

Powai, Mumbai 400 076, India. E-mail: [cprao@iitb.ac.in](mailto:cprao@iitb.ac.in)

## Contents

|                                                                                          |    |
|------------------------------------------------------------------------------------------|----|
| SI 01 TEM micrographs of lectins in absence of metal ions                                | S2 |
| SI 02 TEM micrographs of Plasmid PBR322 as control                                       | S2 |
| SI 03 AFM micrographs of Zn <sup>2+</sup> induced nanosheets in PNA                      | S3 |
| SI 04 SEM micrographs of Zn <sup>2+</sup> and Cu <sup>2+</sup> induced nanosheets in PNA | S4 |

**SI 01 TEM micrographs of lectins in absence of metal ions.**

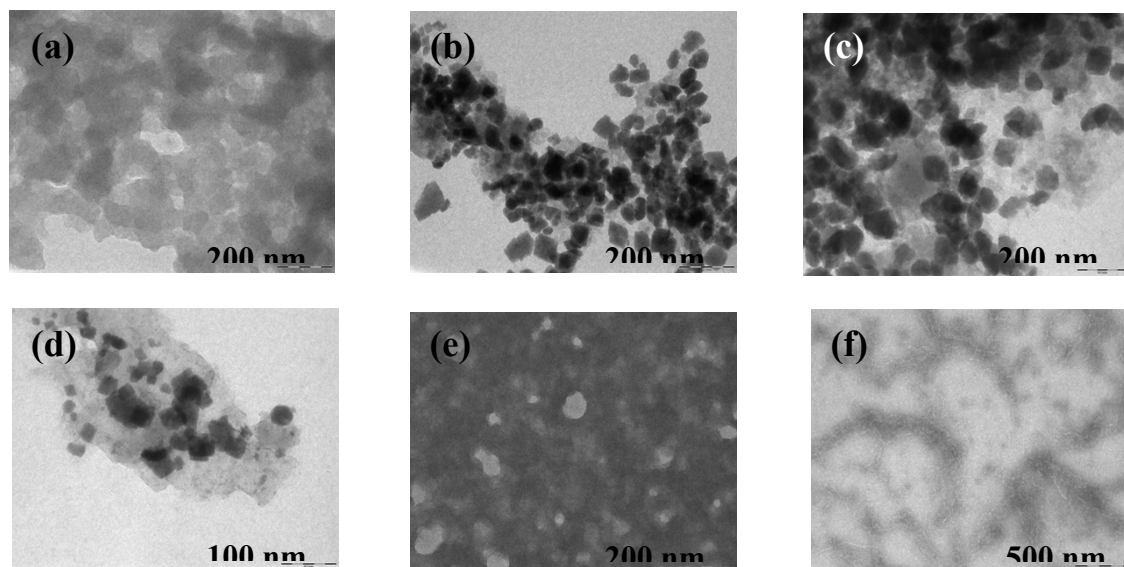

**Fig. S01** TEM micrographs for the control experiments carried out with lectins in the absence of  $\text{Zn}^{2+}$  or  $\text{Cu}^{2+}$  but keeping all the other experimental conditions same: (a) DBL, (b) PSA, (c) ConA, (d) PHA-E, (e) WGA and (f) ASA.

**SI 02 TEM micrographs of Plasmid PBR322 as control.**

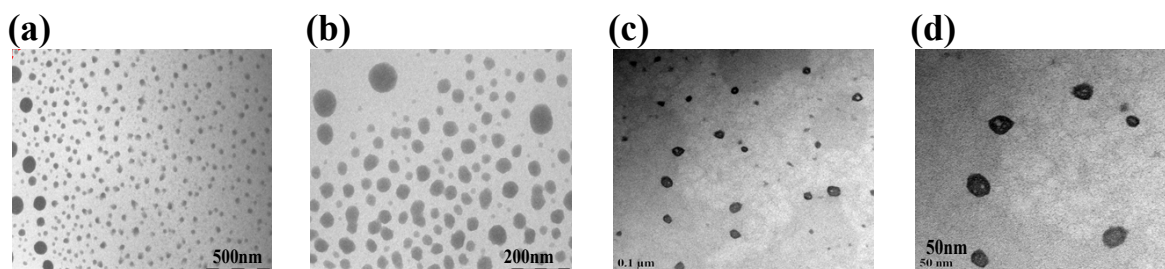

**Fig. S02** TEM micrographs of PBR322: (a-d) control showing only PBR322.

### SI 03 AFM micrographs of Zn<sup>2+</sup> induced nanosheets in PNA.

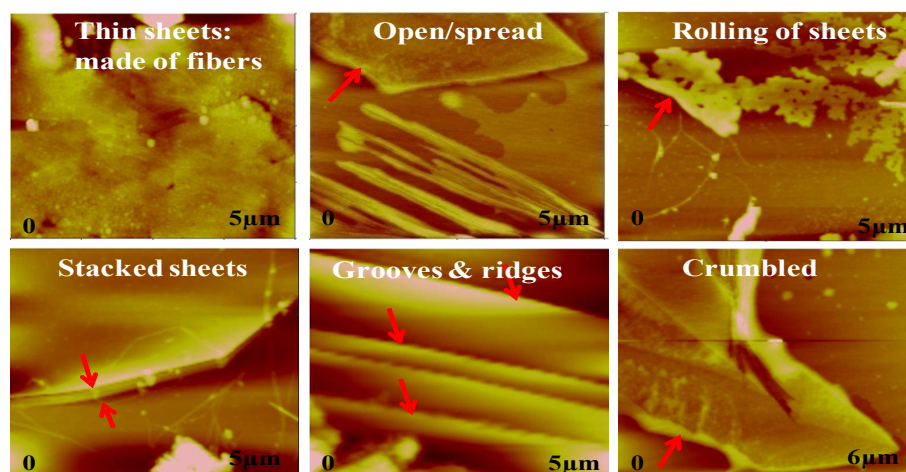

**Fig. S03A** AFM micrograph shows Zn<sup>2+</sup> induced nanosheets from PNA. Different types are sheets have been marked.

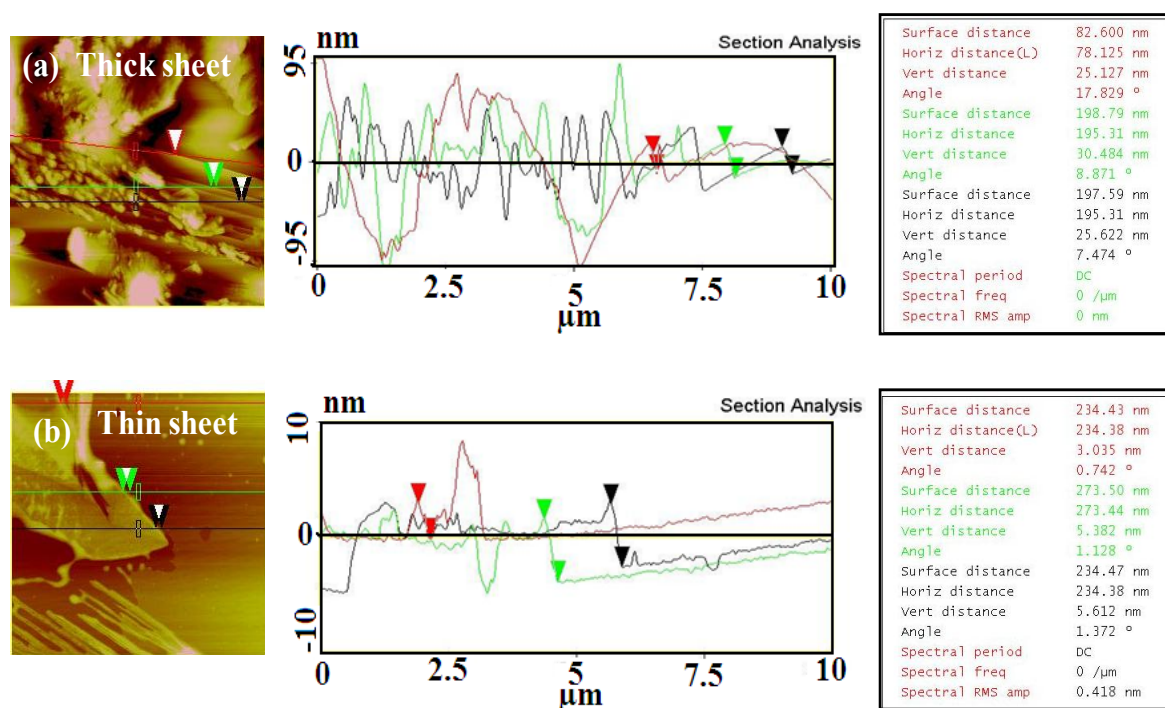

**Fig. S03B** Height measurements for (a) thick and (b) thin sheets at three positions calculated.

**SI 04 SEM micrographs of  $\text{Zn}^{2+}$  and  $\text{Cu}^{2+}$  induced nanosheets in PNA.**

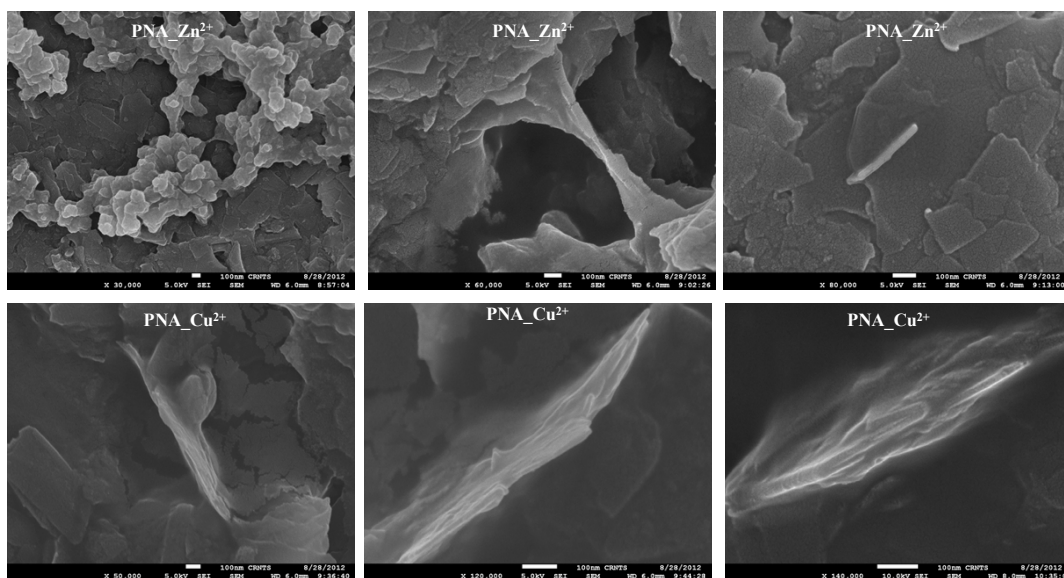

**Fig. S04** SEM micrograph shows  $\text{Zn}^{2+}$  and  $\text{Cu}^{2+}$  induced nanosheets from PNA.
